# Supplementary material for: Radiocarbon analysis reveals underestimation of soil organic carbon persistence in new-generation soil models
Source: Copernicus journal article supplement (doi:10.5194/gmd-17-5961-2024), 2024-08-09
Supplement: Supplementary file 1 [file gmd-17-5961-2024-supplement.zip]

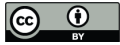

## *Supplement of*

# **Radiocarbon analysis reveals underestimation of soil organic carbon persistence in new-generation soil models**

Alexander S. Brunmayr et al.

*Correspondence to:* Alexander S. Brunmayr ([asb219@ic.ac.uk](mailto:asb219@ic.ac.uk))

- [gmd-17-5961-2024-supplement-title-page.pdf](#)
- Tables
  - [Tab.2 all\\_bias.csv](#)
  - [Tab.2 all\\_rmse.csv](#)
  - [Tab.S.1 check\\_14C\\_implementation\\_MIMICS2021.xlsx](#)
  - [Tab.S.2 check\\_14C\\_implementation\\_SOMic\\_Schrumpf\\_2013\\_Bugac\\_Bugac.1.xlsx](#)
  - [Tab.S.3 error.xlsx](#)
  - [Tab.S.4 israd\\_and\\_soilgrids\\_data.xlsx](#)
  - [Tab.S.5 observed\\_and\\_predicted.xlsx](#)
- Figures
  - [Fig.S.1 environment\\_plots](#)
  - [Fig.S.2 predicted\\_14C\\_all](#)
  - [Fig.S.3 predicted\\_vs\\_observed](#)

The copyright of individual parts of the supplement might differ from the article licence.
